# Supplementary material for: A high power metal-supported protonic ceramic fuel cell using increased proton conductivity in the cathode functional layer of La 1− x Sr x ScO 3 (LSSc, x = 0.1–0.25)
Source: Royal Society of Chemistry journal article supplement (doi:10.1039/d4ta06783e), 2024-12-03
Supplement: d4ta06783e1.pdf [file d4ta06783e1.pdf]

## Supplementary Information

### High Power Metal-Support Protonic Ceramic Fuel Cell using Increased Proton Conductivity in Cathode Functional Layer of $\text{La}_{1-x}\text{Sr}_x\text{ScO}_3$ (LSSc, $x=0.1-0.25$ )

Hyo-Young Kim <sup>a</sup>, Motonori Watanabe <sup>ab</sup>, Jun Tae Song <sup>bc</sup>, Miki Inada <sup>bc</sup> and Tatsumi Ishihara <sup>\*abc</sup>

<sup>a</sup> Department of Automotive Science, Graduate School of Integrated Frontier Sciences, Kyushu University, Motooka 744, Nishiku, Fukuoka, 819-0395, Japan

<sup>b</sup> International Institute for Carbon Neutral Energy Research (WPI-I<sup>2</sup>CNER), Kyushu University, Motooka 744, Nishiku, Fukuoka, 819-0395, Japan

<sup>c</sup> Department of Applied Chemistry, Faculty of Engineering, Kyushu University, Motooka 744, Nishiku, Fukuoka, 819-0395, Japan

\*Corresponding author email: ishihara@cstf.kyushu-u.ac.jp

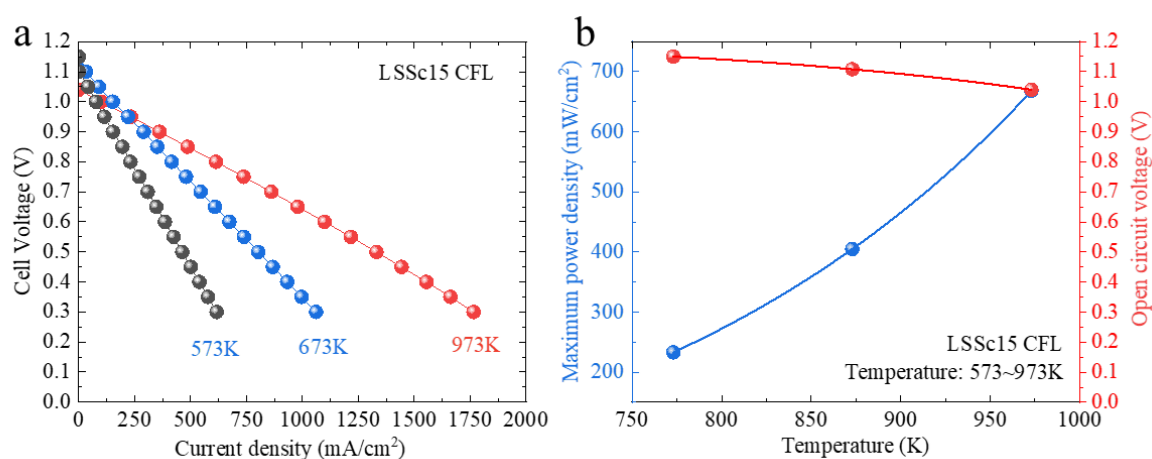

**Figure S1.** I-V curve and temperature dependence of MPD and OCV of the cell using LSSc15 CFL

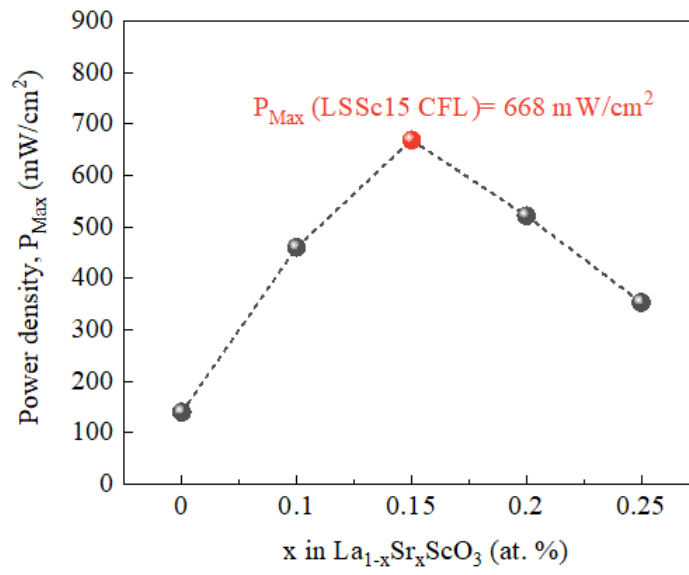

**Figure S2.** Comparison of maximum power density with different Sr dopant

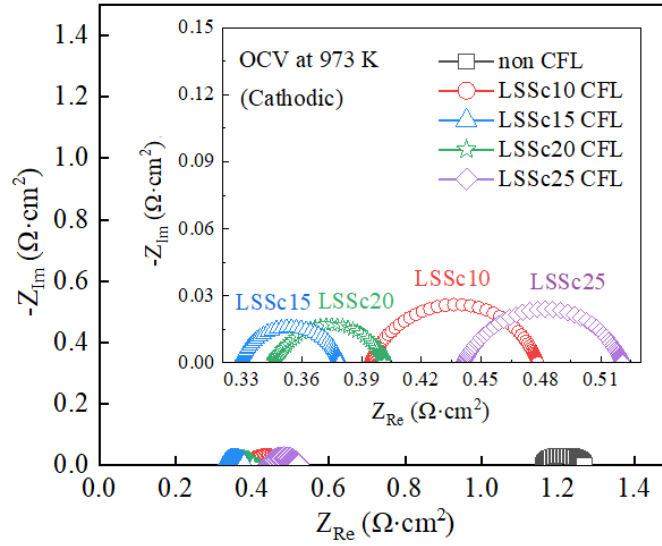

**Figure S3.** EIS spectra of cathodic non, LSSc10, LSSc20, and LSSc25 CFL at 973K.

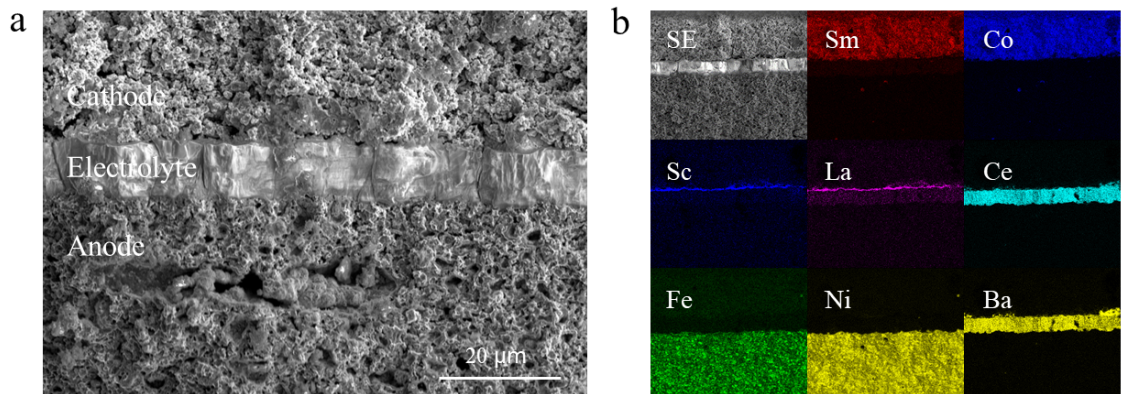

**Figure S4.** (a) SEM and (b) EDS-mapping image of the cross-section after cell test.

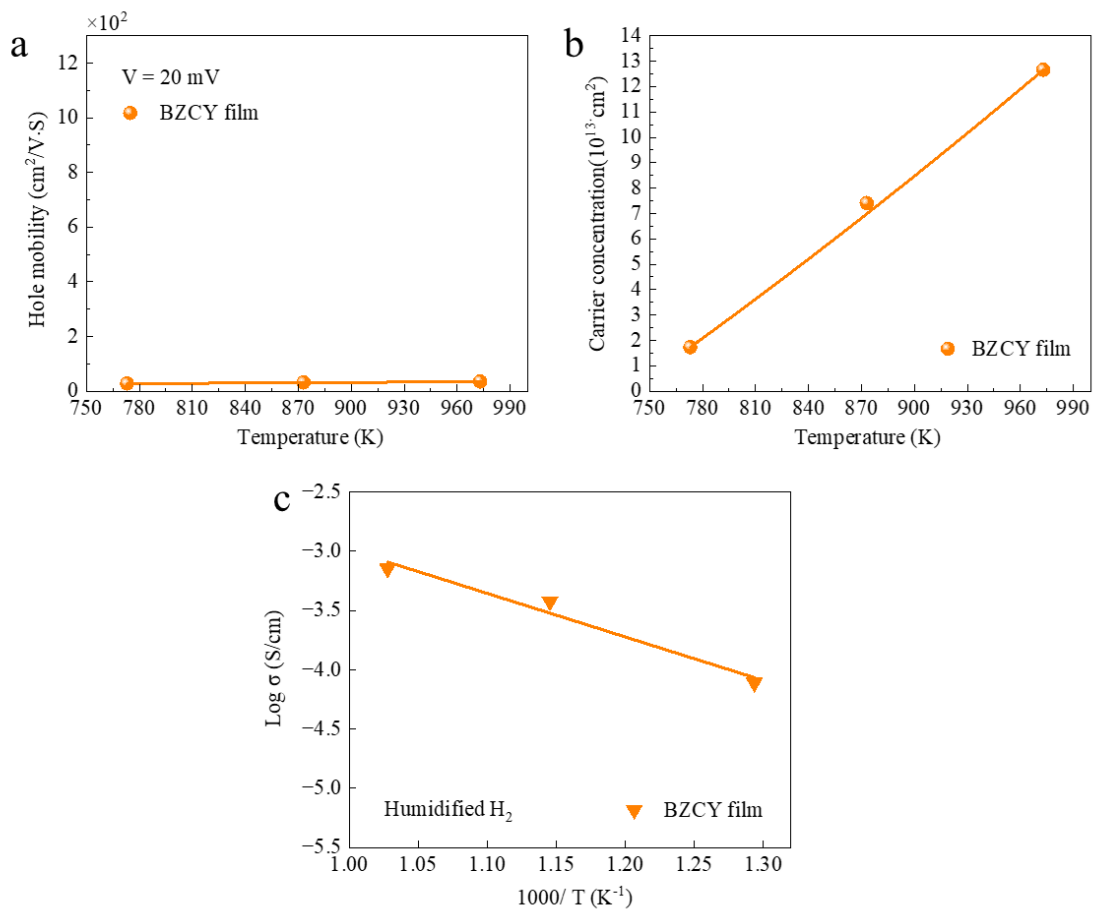

**Figure S5.** (a) Hole mobility (b) carrier concentration (c) conductivity of BZCY film under humidified (3% H<sub>2</sub>O) H<sub>2</sub> condition.

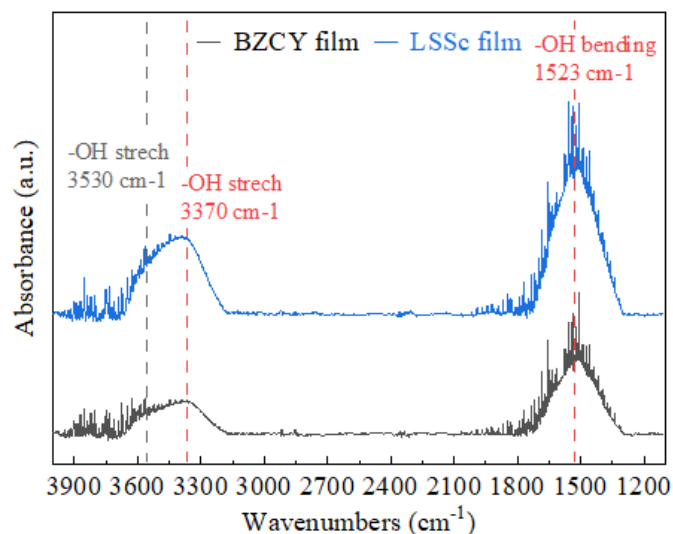

**Figure S6.** FT-IR spectra of LSSc and BZCY film after exposure to humidified condition at room temperature.

FT-IR spectroscopy was conducted to assess the proton concentration of LSSc and BZCY films by analyzing the amount of hydroxyl (OH) group in the film. As shown in **Figure S4**, the FT-IR spectra reveal two strong but broad absorption bands at approximately 3530 and 3370  $\text{cm}^{-1}$ . The peak at 3530  $\text{cm}^{-1}$  is typically attributed to OH bands associated with adsorption of water. The stronger intensity of the OH band suggests that the proton concentration in the LSSc was larger than that of BZCY. Compared to BZCY, LSSc shows an increased intensity of the 3370  $\text{cm}^{-1}$  peak, suggesting a higher proton concentration in LSSc films. In particular, the strong OH peak around 1523  $\text{cm}^{-1}$  also indicates water adsorption or hydration in proton-conducting materials, so these results can support high proton concentration in LSSc film.

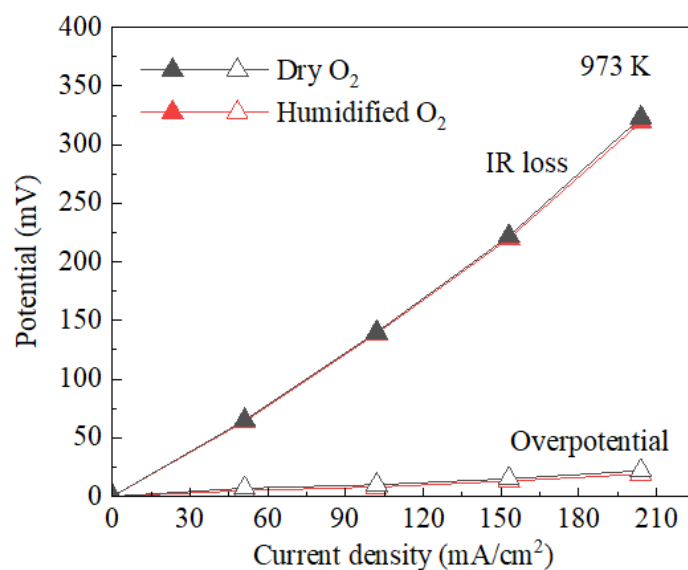

**Figure S7.** Internal resistance of dry and humidified O<sub>2</sub> without CFL

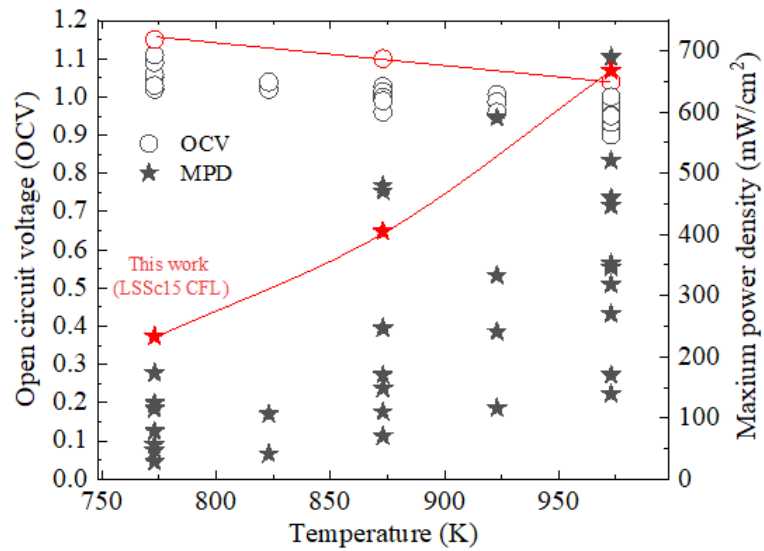

**Figure S8.** Comparison of OCV and MPD with conventional PCFCs as shown in Table S3 and proposed cell (LSSc CFL)

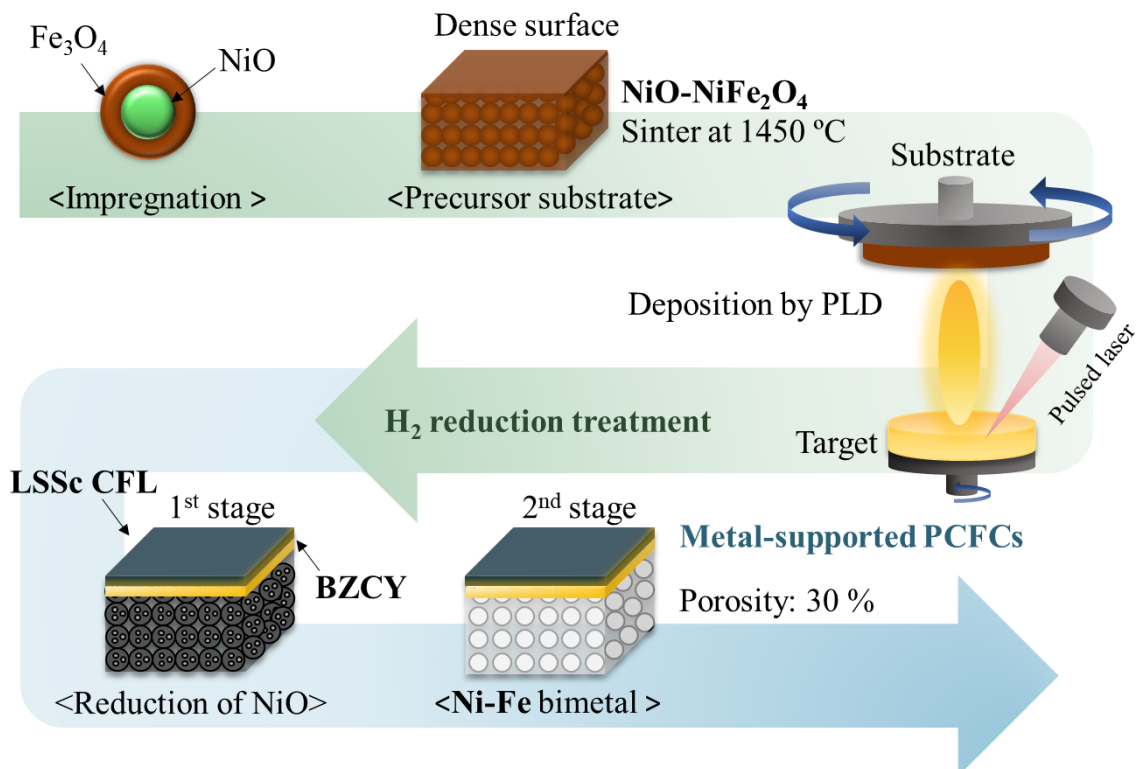

**Figure S9.** Schematic image of PCFCs preparation



**Table S1.** Element composition of LSSc20 bulk and film

| at % (wt %) | Bulk         | Film         |
|-------------|--------------|--------------|
| La          | 36.58 (0.73) | 36.32 (0.73) |
| Sr          | 8.90(0.18)   | 8.34 (0.17)  |
| Sc          | 54.52 (1.1)  | 55.33 (1.11) |

**Table S2.** Comparison of anode support before and after the reaction

| Reduction                                         | Diameter | Porosity | Shrinkage               |
|---------------------------------------------------|----------|----------|-------------------------|
| Before<br>(NiO-NiFe <sub>2</sub> O <sub>4</sub> ) | 18.5 mm  | 0.05 %   | 5.5 %<br>by dilatometer |
| After<br>(Ni-Fe)                                  | 17.5 mm  | 30.1 %   |                         |

**Table S3.** Cell performances of PCFCs with LSSc CFL measured in this study at 973K

| No. | Support         | Electrolyte              | Interlayer | Cathode                                              | OCV<br>(V) | MPD<br>(mW/cm <sup>2</sup> ) | Ohmic<br>(Ω·cm <sup>2</sup> ) | Polarization<br>(Ω·cm <sup>2</sup> ) |
|-----|-----------------|--------------------------|------------|------------------------------------------------------|------------|------------------------------|-------------------------------|--------------------------------------|
| 1   | Porous<br>Ni-Fe | BaZr(Ce,Y)O <sub>3</sub> | BZCY       | Sm <sub>0.5</sub> Sr <sub>0.5</sub> CoO <sub>3</sub> | 0.95       | 139                          | 1.15                          | 0.11                                 |
| 2   | Porous<br>Ni-Fe | BaZr(Ce,Y)O <sub>3</sub> | LSS10      | Sm <sub>0.5</sub> Sr <sub>0.5</sub> CoO <sub>3</sub> | 1.0        | 460                          | 0.39                          | 0.08                                 |
| 3   | Porous<br>Ni-Fe | BaZr(Ce,Y)O <sub>3</sub> | LSS15      | Sm <sub>0.5</sub> Sr <sub>0.5</sub> CoO <sub>3</sub> | 1.04       | 668                          | 0.32                          | 0.05                                 |
| 4   | Porous<br>Ni-Fe | BaZr(Ce,Y)O <sub>3</sub> | LSS20      | Sm <sub>0.5</sub> Sr <sub>0.5</sub> CoO <sub>3</sub> | 1.0        | 521                          | 0.34                          | 0.06                                 |
| 5   | Porous<br>Ni-Fe | BaZr(Ce,Y)O <sub>3</sub> | LSS25      | Sm <sub>0.5</sub> Sr <sub>0.5</sub> CoO <sub>3</sub> | 1.0        | 353                          | 0.44                          | 0.08                                 |

**Table S4.** Comparison of conventional PCFCs using BZCY electrolyte

| Author<br>(Years)             | Electrolyte | Anode<br>Support | Operating<br>Temperature<br>(K) | Open<br>Circuit<br>Voltage (V) | Power<br>Density<br>(mW/cm <sup>2</sup> ) | Ref |
|-------------------------------|-------------|------------------|---------------------------------|--------------------------------|-------------------------------------------|-----|
| Wang et al.<br>(2006)         | BZCY        | Ni-BZCY          | 973                             | 0.97                           | 270                                       | [1] |
|                               |             |                  | 873                             | 1.01                           | 148                                       |     |
|                               |             |                  | 773                             | 1.05                           | 56                                        |     |
| Peng et al.<br>(2024)         | BZCY        | Ni-BZCY          | 973                             | 0.975                          | 690                                       | [2] |
|                               |             |                  | 923                             | 1.007                          | 591                                       |     |
|                               |             |                  | 873                             | 1.027                          | 471                                       |     |
| Ma et al.<br>(2021)           | BZCY        | Ni-BZCY          | 973                             | 0.92                           | 318                                       | [3] |
|                               |             |                  | 923                             | 0.96                           | 241                                       |     |
|                               |             |                  | 873                             | 1.0                            | 170                                       |     |
| Bae et al.<br>(2015)          | BZY         | Ni-BZY           | 823                             | 1.02                           | 106                                       | [4] |
|                               |             |                  | 973                             | 0.9                            | 346                                       |     |
|                               |             |                  | 873                             | 0.96                           | 246                                       |     |
| Pergolesi et<br>al.<br>(2010) | BZY         | Ni-BZY           | 773                             | 1.05                           | 115                                       | [5] |
|                               |             |                  | 873                             | 0.99                           | 110                                       |     |
|                               |             |                  | 773                             | 1.06                           | 47                                        |     |
| Sun et al.<br>(2010)          | BZY         | Ni-BZY           | 973                             | 0.953                          | 170                                       | [6] |
|                               |             |                  | 923                             | 0.987                          | 116                                       |     |
|                               |             |                  | 873                             | 1.014                          | 70                                        |     |
| Duan et al.<br>(2015)         | BZY         | Ni-BZY           | 823                             | 1.039                          | 41                                        | [7] |
|                               |             |                  | 873                             | 1.0                            | 480                                       |     |
|                               |             |                  | 973                             | 0.933                          | 447                                       |     |
| Qian et al.<br>(2014)         | BZY/BCY     | Ni-BZCY          | 923                             | 0.96                           | 333                                       | [8] |
|                               |             |                  | 873                             | 0.99                           | 247                                       |     |
|                               |             |                  | 773                             | 1.02                           | 173                                       |     |



## Reference of Supporting Information

1. B. Wang, L. Bi, and X. S. Zhao, *J. Power Sources*, 2018, **399**, 207-214.
2. C. Peng, B. Zhao, X. Meng, X. Ye and T. Luo, *Membranes*, 2024, **14**, 61.
3. Y. Ma, J. Huang and B. He, *Ceram. Int.*, 2021, **47**, 14680-14688.
4. H. Bae and G.M. Choi, *J. Power Sources*, 2015, **285**, 431-438.
5. D. Pergolesi, E. Fabbri and E. Traversa, *Electrochem. Commun.*, 2010, **12**, 977-980.
6. W. Sun., L. Yan, Z. Shi, Z. Zhu and W. Liu, *J. Power Sources*, 2010, **195**, 4727-4730.
7. C. Duan, J. Tong, M. Shang, S. Nikodemski, M. Sanders, S. Ricote, A. Almansoori and R. O'hayre, *Science*, 2015, **349**, 1321-1326.
8. J. Qian, W. Sun, Q. Zhang, G. Jiang and W. Liu, *J. Power Sources*, 2014, **249**, 131-136.
